# Supplementary material for: The Relation between Physical Education Teachers’ (De-)Motivating Style, Students’ Motivation, and Students’ Physical Activity: A Multilevel Approach
Source: Int J Environ Res Public Health. 2021 Jul 13;18(14):7457. doi: 10.3390/ijerph18147457 (PMC8307004; doi:10.3390/ijerph18147457)
Supplement: Supplementary file 1 [file ijerph-18-07457-s001.zip › ijerph-1261886-supplementary.pdf]

**Table S1.** Descriptive statistics and bivariate Pearson correlations for boys.

| Variable                                   | N   | Mean (SD)     | 2    | 3   | 4      | 5     | 6                 | 7     | 8                 | 9      | 10     |
|--------------------------------------------|-----|---------------|------|-----|--------|-------|-------------------|-------|-------------------|--------|--------|
| 1. Percentage of MVPA during PE            | 159 | 19.99 (12.50) | .19* | .09 | -.07   | .23** | .01               | .13   | .14 <sup>§</sup>  | -.05   | -.06   |
| 2. Autonomous motivation                   | 159 | 3.84 (.73)    |      | .04 | -.47** | .33** | .28**             | .39** | .39**             | -.27** | -.26** |
| 3. Controlled motivation                   | 159 | 1.80 (.64)    |      |     | .34**  | .22** | .08               | .10   | .16*              | .38**  | -.08   |
| 4. Amotivation                             | 159 | 1.60 (.70)    |      |     |        | -.08  | -.16 <sup>§</sup> | -.17* | -.15 <sup>§</sup> | .33**  | .10    |
| 5. Perceived teachers' autonomy-support    | 158 | 3.27 (.81)    |      |     |        |       | .56**             | .65** | .86**             | .01    | -.07   |
| 6. Perceived teachers' structure           | 158 | 3.45 (.81)    |      |     |        |       |                   | .64** | .85**             | .02    | .06    |
| 7. Perceived teachers' relatedness-support | 158 | 3.54 (.73)    |      |     |        |       |                   |       | .88**             | -.13   | -.08   |
| 8. Perceived teachers' motivating style    | 158 | 3.42 (.68)    |      |     |        |       |                   |       |                   | -.04   | -.04   |
| 9. Perceived teachers' controlling style   | 158 | 1.83 (.65)    |      |     |        |       |                   |       |                   |        | -.02   |
| 10. Students' age                          | 123 | 13.09 (1.06)  |      |     |        |       |                   |       |                   |        |        |

\*\*Correlation is significant at the 0.01 level; \*Correlation is significant at the 0.05 level; <sup>§</sup> correlation showed a trend towards significance at the 0.10 level; MVPA moderate- to vigorous-intensity physical activity, PE physical education.

**Table S2.** Descriptive statistics and bivariate Pearson correlations for girls.

| Variable                                   | N   | Mean (SD)    | 2   | 3                | 4                 | 5     | 6      | 7     | 8      | 9      | 10    |
|--------------------------------------------|-----|--------------|-----|------------------|-------------------|-------|--------|-------|--------|--------|-------|
| 1. Percentage of MVPA during PE            | 140 | 18.10 (8.63) | .11 | -.08             | -.14 <sup>§</sup> | .04   | -.09   | .05   | -.01   | -.22** | .06   |
| 2. Autonomous motivation                   | 140 | 3.82 (.73)   |     | .15 <sup>§</sup> | -.34**            | .45** | .35**  | .53** | .52**  | -.04   | -.20* |
| 3. Controlled motivation                   | 140 | 1.72 (.58)   |     |                  | .19**             | .05*  | .03    | -.01  | .03    | .36**  | -.10  |
| 4. Amotivation                             | 140 | 1.43 (.57)   |     |                  |                   | -.21* | -.14** | -.21* | -.21** | .17**  | .04   |
| 5. Perceived teachers' autonomy-support    | 140 | 3.35 (.71)   |     |                  |                   |       | .54**  | .59** | .84**  | -.06   | .05   |
| 6. Perceived teachers' structure           | 140 | 3.58 (.78)   |     |                  |                   |       |        | .55** | .84**  | -.01   | -.10  |
| 7. Perceived teachers' relatedness-support | 140 | 3.64 (.66)   |     |                  |                   |       |        |       | .84**  | -.13*  | -.01  |
| 8. Perceived teachers' motivating style    | 140 | 3.52 (.60)   |     |                  |                   |       |        |       |        | -.07   | -.03  |
| 9. Perceived teachers' controlling style   | 140 | 1.57 (.50)   |     |                  |                   |       |        |       |        |        | -.12  |
| 10. Students' age                          | 105 | 13.01 (1.01) |     |                  |                   |       |        |       |        |        |       |

\*\*Correlation is significant at the 0.01 level; \*Correlation is significant at the 0.05 level; <sup>§</sup> correlation showed a trend towards significance at the 0.10 level; MVPA moderate- to vigorous-intensity physical activity, PE physical education.

**Table S3.** Descriptive statistics and bivariate Pearson correlations for ball games.

| Variable                                   | N  | Mean (SD)     | 2   | 3    | 4      | 5     | 6     | 7     | 8     | 9      | 10                |
|--------------------------------------------|----|---------------|-----|------|--------|-------|-------|-------|-------|--------|-------------------|
| 1. Percentage of MVPA during PE            | 74 | 26.23 (13.87) | .08 | .03  | .03    | .05   | -.11  | -.03  | -.03  | 0.04   | .39**             |
| 2. Autonomous motivation                   | 74 | 3.96 (.62)    |     | -.13 | -.35** | .31** | .24*  | .34** | .34** | -.33** | -.25 <sup>s</sup> |
| 3. Controlled motivation                   | 74 | 1.91 (.73)    |     |      | .41**  | .04   | .04   | -.04  | .01   | .44**  | -.13              |
| 4. Amotivation                             | 74 | 1.45 (.67)    |     |      |        | -.05  | .02   | -.07  | -.04  | .36**  | -.11              |
| 5. Perceived teachers' autonomy-support    | 74 | 3.67 (.80)    |     |      |        |       | .56** | .65** | .86** | -.07   | -.08              |
| 6. Perceived teachers' structure           | 74 | 3.75 (.77)    |     |      |        |       |       | .63** | .85** | -.1    | -.12              |
| 7. Perceived teachers' relatedness-support | 74 | 3.83 (.67)    |     |      |        |       |       |       | .87** | -.12   | -.16              |
| 8. Perceived teachers' motivating style    | 74 | 3.75 (.64)    |     |      |        |       |       |       |       | -.11   | -.14              |
| 9. Perceived teachers' controlling style   | 74 | 1.64 (.58)    |     |      |        |       |       |       |       |        | -.03              |
| 10. Students' age                          | 48 | 12.79 (1.05)  |     |      |        |       |       |       |       |        |                   |

\*\*Correlation is significant at the 0.01 level; \*Correlation is significant at the 0.05 level; <sup>s</sup> correlation showed a trend towards significance at the 0.10 level; MVPA moderate- to vigorous-intensity physical activity, PE physical education.

**Table S4** Descriptive statistics and bivariate Pearson correlations for artistic sports.

| Variable                                   | N  | Mean (SD)     | 2     | 3    | 4      | 5                 | 6     | 7     | 8     | 9                | 10                |
|--------------------------------------------|----|---------------|-------|------|--------|-------------------|-------|-------|-------|------------------|-------------------|
| 1. Percentage of MVPA during PE            | 69 | 16.65 (11.04) | .35** | -.03 | -.29*  | .13               | -.06  | .14   | .08   | -.14             | .24 <sup>s</sup>  |
| 2. Autonomous motivation                   | 69 | 3.90 (.76)    |       | .07  | -.50** | .32**             | .20   | .39** | .34** | -.15             | -.24 <sup>s</sup> |
| 3. Controlled motivation                   | 69 | 1.55 (.48)    |       |      | .10    | .12               | .06   | .13   | .12   | .21 <sup>s</sup> | .02               |
| 4. Amotivation                             | 69 | 1.51 (.61)    |       |      |        | -.23 <sup>s</sup> | -.15  | -.29* | -.25* | .23 <sup>s</sup> | .27*              |
| 5. Perceived teachers' autonomy-support    | 68 | 3.26 (.72)    |       |      |        |                   | .61** | .67** | .86** | -.08             | .11               |
| 6. Perceived teachers' structure           | 68 | 3.66 (.73)    |       |      |        |                   |       | .74** | .89** | .14              | .16               |
| 7. Perceived teachers' relatedness-support | 68 | 3.66(.71)     |       |      |        |                   |       |       | .91** | -.04             | .06               |
| 8. Perceived teachers' motivating style    | 68 | 3.52 (.64)    |       |      |        |                   |       |       |       | .01              | .13               |
| 9. Perceived teachers' controlling style   | 68 | 1.59 (.49)    |       |      |        |                   |       |       |       |                  | -.11              |
| 10. Students' age                          | 59 | 13.39 (.93)   |       |      |        |                   |       |       |       |                  |                   |

\*\*Correlation is significant at the 0.01 level; \*Correlation is significant at the 0.05 level; <sup>s</sup> correlation showed a trend towards significance at the 0.10 level; MVPA moderate- to vigorous-intensity physical activity, PE physical education.

**Table S5.** Descriptive statistics and bivariate Pearson correlations for fitness training.

| Variable                                   | N   | Mean (SD)    | 2    | 3     | 4      | 5     | 6     | 7     | 8     | 9     | 10   |
|--------------------------------------------|-----|--------------|------|-------|--------|-------|-------|-------|-------|-------|------|
| 1. Percentage of MVPA during PE            | 119 | 16.89 (6.50) | -.14 | -.06  | .05    | .01   | -.09  | -.04  | -.05  | -.11  | -.12 |
| 2. Autonomous motivation                   | 119 | 3.68 (.76)   |      | .27** | -.35** | .44** | .39** | .52** | .54** | -.04  | -.16 |
| 3. Controlled motivation                   | 119 | 1.77 (.58)   |      |       | .28**  | .19*  | .08   | .08   | .14   | .44** | .06  |
| 4. Amotivation                             | 119 | 1.61 (.67)   |      |       |        | -.11  | -.20* | -.15§ | -.19* | .33** | .08  |
| 5. Perceived teachers' autonomy-support    | 119 | 3.12 (.71)   |      |       |        |       | .53** | .59** | .84** | .01   | -.01 |
| 6. Perceived teachers' structure           | 119 | 3.28 (.86)   |      |       |        |       |       | .49** | .84** | .03   | -.14 |
| 7. Perceived teachers' relatedness-support | 119 | 3.42 (.70)   |      |       |        |       |       |       | .82** | -.20* | -.04 |
| 8. Perceived teachers' motivating style    | 119 | 3.27 (.63)   |      |       |        |       |       |       |       | -.06  | -.08 |
| 9. Perceived teachers' controlling style   | 119 | 1.71 (.59)   |      |       |        |       |       |       |       |       | -.03 |
| 10. Students' age                          | 88  | 12.93 (.98)  |      |       |        |       |       |       |       |       |      |

\*\*Correlation is significant at the 0.01 level; \*Correlation is significant at the 0.05 level; § correlation showed a trend towards significance at the 0.10 level; MVPA moderate- to vigorous-intensity physical activity, PE physical education.

**Table S6.** Descriptive statistics and bivariate Pearson correlations for racket games.

| Variable                                   | N  | Mean (SD)    | 2     | 3    | 4      | 5    | 6    | 7      | 8     | 9     | 10     |
|--------------------------------------------|----|--------------|-------|------|--------|------|------|--------|-------|-------|--------|
| 1. Percentage of MVPA during PE            | 40 | 16.17 (9.02) | .56** | -.08 | -.24   | .19  | -.26 | .11    | .04   | -.16  | -.69** |
| 2. Autonomous motivation                   | 40 | 3.89 (.71)   |       | .01  | -.51** | .37* | .17  | .44**  | .41** | -.37* | -.55** |
| 3. Controlled motivation                   | 40 | 1.84 (.56)   |       |      | .44**  | .16  | .03  | -.05   | .07   | .26   | -.17   |
| 4. Amotivation                             | 40 | 1.43 (.56)   |       |      |        | -.13 | -.25 | -.42** | -.33* | .34*  | .13    |
| 5. Perceived teachers' autonomy-support    | 40 | 3.23 (.75)   |       |      |        |      | .36* | .47**  | .81** | .16   | -.17   |
| 6. Perceived teachers' structure           | 40 | 3.48 (.56)   |       |      |        |      |      | .54**  | .76** | .02   | .18    |
| 7. Perceived teachers' relatedness-support | 40 | 3.47 (.60)   |       |      |        |      |      |        | .82** | -.04  | -.12   |
| 8. Perceived teachers' motivating style    | 40 | 3.39 (.51)   |       |      |        |      |      |        |       | .07   | -.05   |
| 9. Perceived teachers' controlling style   | 40 | 2.04 (.69)   |       |      |        |      |      |        |       |       | .01    |
| 10. Students' age                          | 33 | 13.15 (1.20) |       |      |        |      |      |        |       |       |        |

\*\*Correlation is significant at the 0.01 level; \*Correlation is significant at the 0.05 level; MVPA moderate- to vigorous-intensity physical activity, PE physical education.

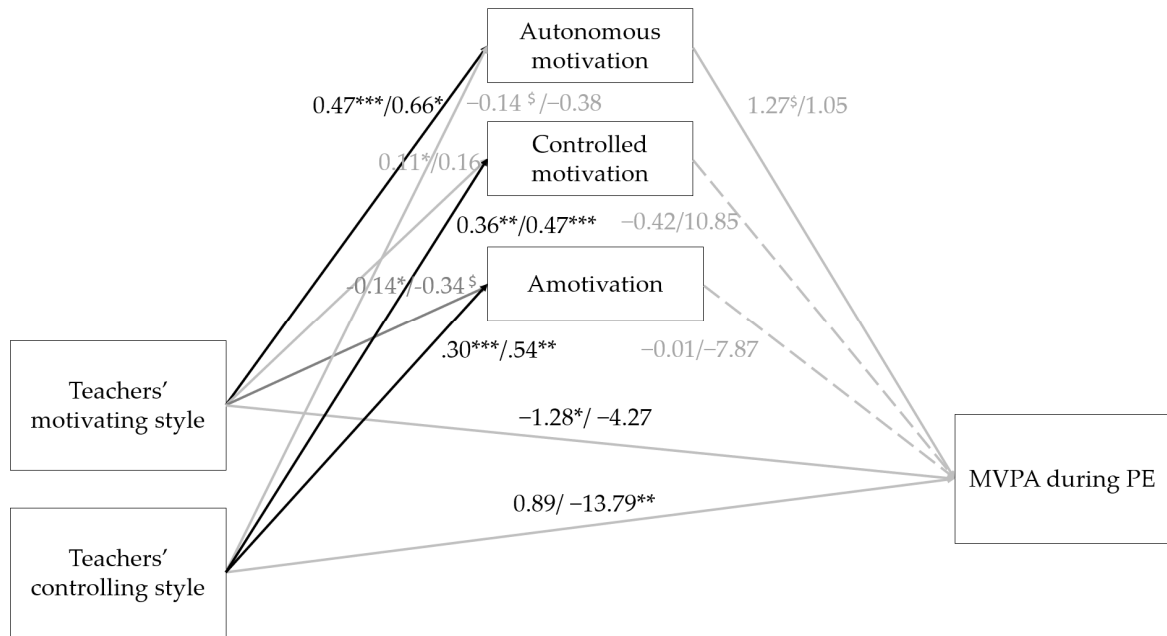

**Figure S1.** Full model with teachers' (de-)motivating style as a possible predictor for students' MVPA during PE, when taking students' gender, students' age and lesson topic into account (using imutations).

$\beta$ s are presented at both the student-level (first number) and the class-level ( $\beta_{\text{student-level}}/\beta_{\text{class-level}}$ ); <sup>§</sup> $p < 0.1$ ; \* $p < 0.05$ ; \*\* $p < 0.01$ ; \*\*\* $p < 0.001$ ; MVPA moderate- to vigorous-intensity physical activity; PE physical education.
